# Supplementary material for: Glioblastoma CD105+ cells define a SOX2− cancer stem cell-like subpopulation in the pre-invasive niche
Source: PubMed Central journal article supplement (PMC9426031; doi:10.1186/s40478-022-01422-8), 2022-08-29

## Supplementary data

### Supplementary figures

**Fig. S1** GBM CD105<sup>+</sup> cell localization and specificity. A CD105<sup>+</sup> cells in GBM tumor and pre-invasive niche. Sections stained with CD105 (red) and Ki67 (green). The tumor and peritumor area are verified by Ki67<sup>+</sup> cell quantification. \*\* P<0.01. B The landscape of SOX2<sup>+</sup> and CD105<sup>+</sup> cells in the GBM preinvasive niche. The images show the distribution of CD105<sup>+</sup> and SOX2<sup>+</sup> cells by IF. Gamma value = 0.5. C CD105 expression on non-tumor brain tissue and GBM tissue. Non-tumor tissue was collected from the temporal lobe of epilepsy patients (n=3). Immuno-double staining with CD105 and CD31 show differential expression of these markers.

**Fig. S2** GBM CD105<sup>+</sup> cells cultured in vitro. A The morphology of CD105<sup>+</sup> cells cultured for 3 and 30 days. Long-term cell culture of CD105<sup>+</sup> cells showing the cell shape changes from tripolar or multipolar cells into flatten and enlarged cells. B Differentiation ability of GBM CD105<sup>+</sup> cells. GBM CD105<sup>+</sup> cell lines (n=8) were cultured in adipocyte, osteocyte and chondrocyte differentiation conditions for 14 days. Osteocytes and adipocytes were identified by the cell surface markers osteocalcin and FABP4, respectively. C Immunostaining of CD105<sup>+</sup> cell with cell type markers in long-term cell culture. Double immunostaining of CD105 (red) and cellular markers (green) of sorted CD105<sup>+</sup> cells (under P3). D SOX2<sup>+</sup> cells cultured in different concentrations of serum. Ki67 staining (green) shows the difference between each culture condition. Cell proliferation is quantified by Ki67 positive cells. ns P> 0.05

**Fig. S3** Kaplan–Meier survival curves comparing different xenograft mouse models. Survival of U87 group (n=5), 2D or 3D cultured CD105<sup>+</sup> cell groups (n=14 each group) and mesenchymal stromal cell group (n=5) is analyzed statistically by Log rank test.

**Fig. S4** Exome sequencing of GBM CD105<sup>+</sup> cells. A The number of locations in the reference genome with the depth of coverage. The depth of coverage of the base position shows the number of high-quality reads mapping to the reference at this position. B Average of the coverage of each chromosome. Average coverage is calculated by the sequencing depth per chromosome. Samples are represented by different color curves. C GC content of sequences. GC content of each sample is calculated by the percentage of sequences. D Mean sequencing quality.

The sequencing quality of each sample is shown by the number of reads with per sequencing quality scores (Phred scores) E The distribution of reads is divided into unique, duplicated and unmapped types. M = million. F The distribution of fragment lengths is estimated by the number of mapped reads. The prevent long flat tail shows the unique points supported by at least 5 reads. The plot is also smoothed down by showing 300 points on the X-axis to reduce noise. G The relations between top 20 mutant genes of GBM CD105<sup>+</sup> cells and disease-specific survival in the TCGA database. ns=P>0.05

**Fig. S6** Cell toxicity assays on CD105<sup>+</sup> and SOX<sup>+</sup> cells lines. Different concentration of temozolomide (A, C) and bevacizumab (B, D) cultured with MGMT promotor methylated CD105<sup>+</sup> or SOX2<sup>+</sup> cell lines (GBM B16) and MGMT wildtype CD105<sup>+</sup> or SOX2<sup>+</sup> cell lines (GBM B14) for 96h. Fluorescence units represent the cell viability detected at 24h, 48h, 72h and 96h. \*P<0.05

Fig. S1

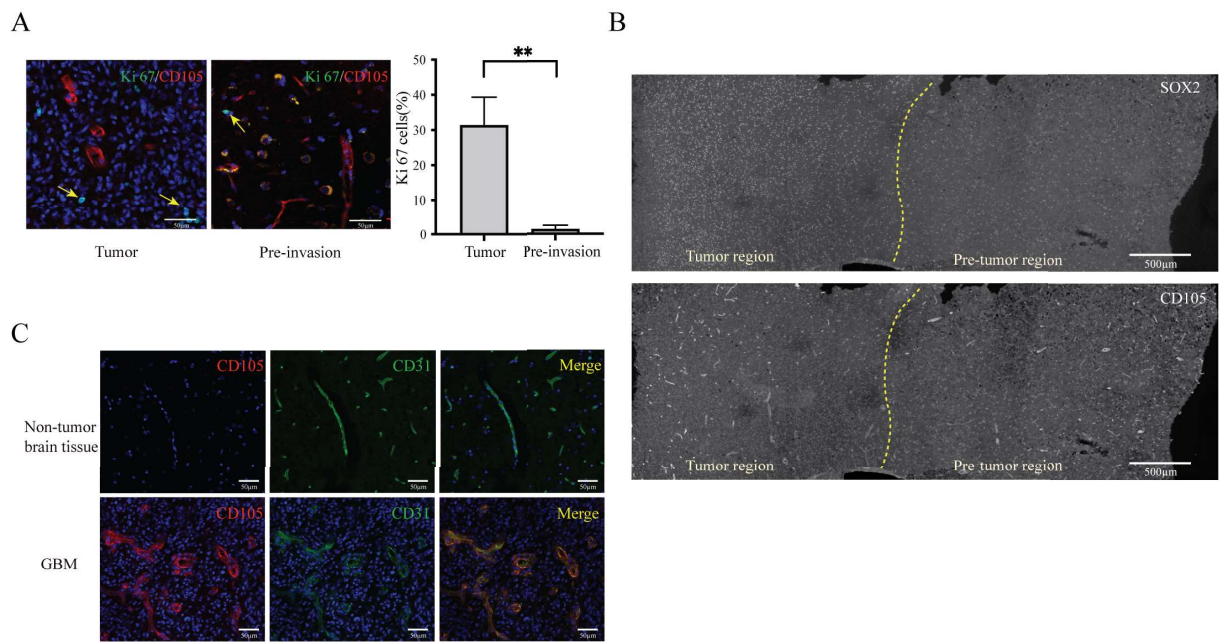

Fig.S2

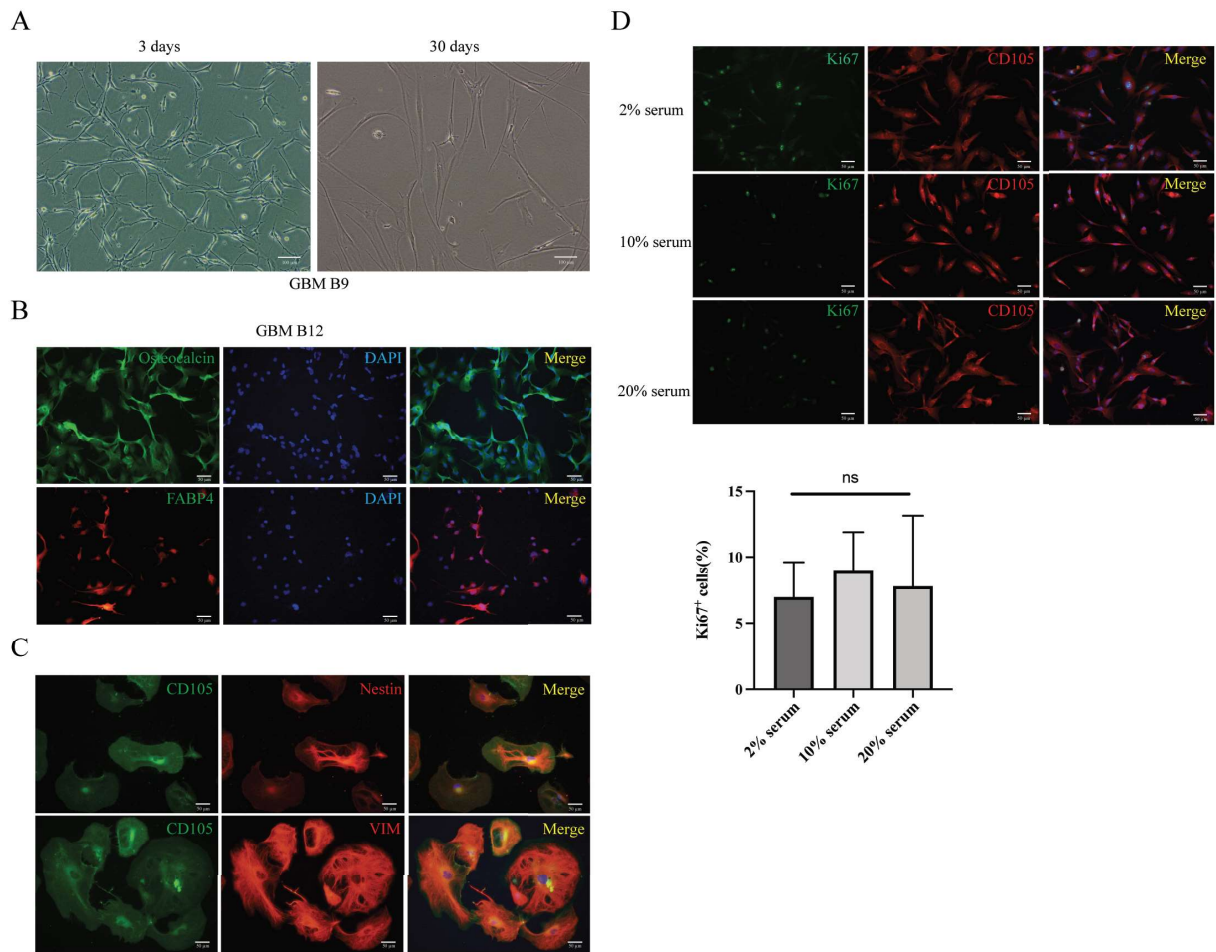

Fig.S3

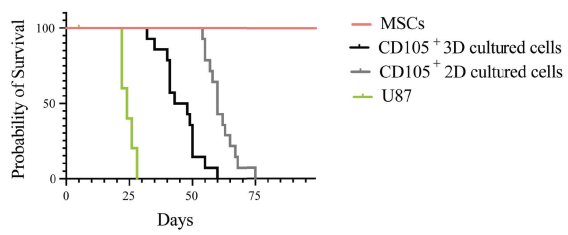

Fig.S4

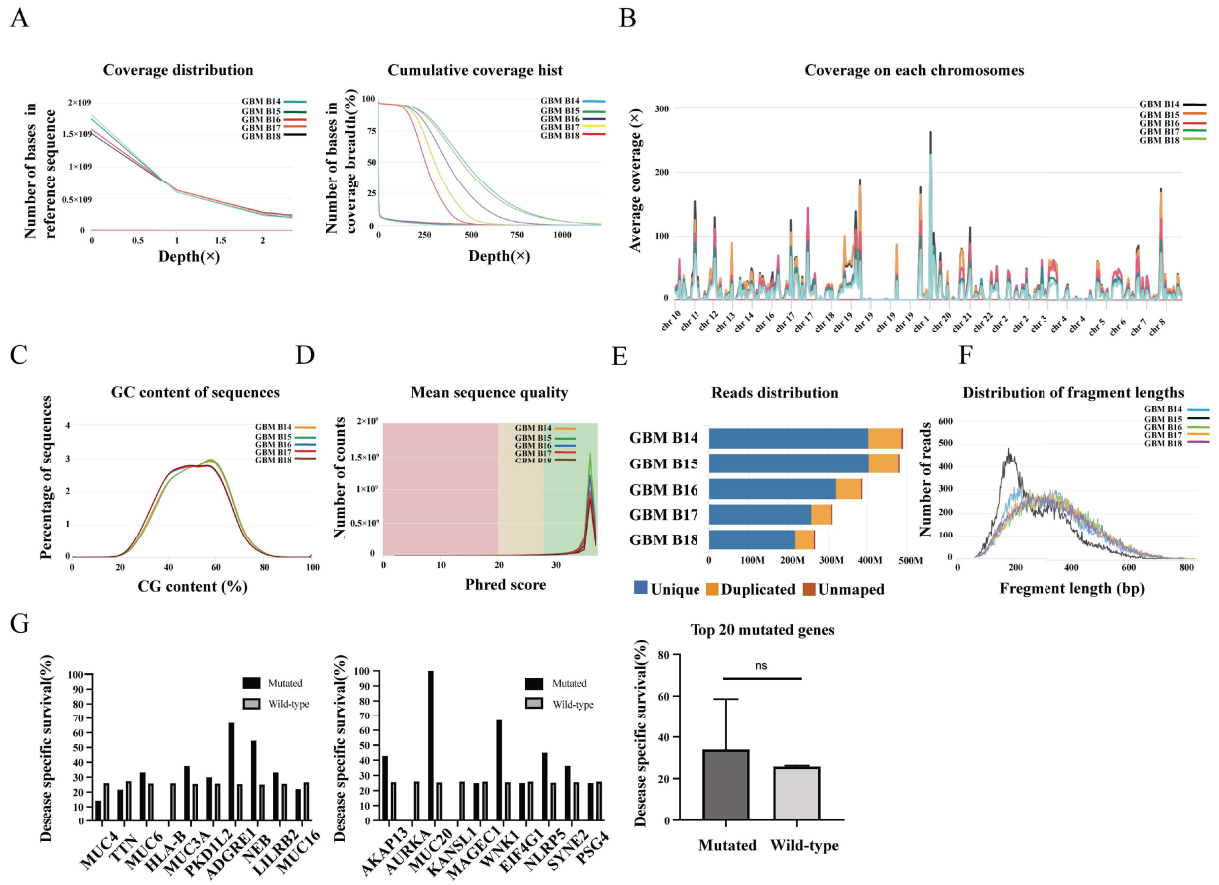

Fig.S6

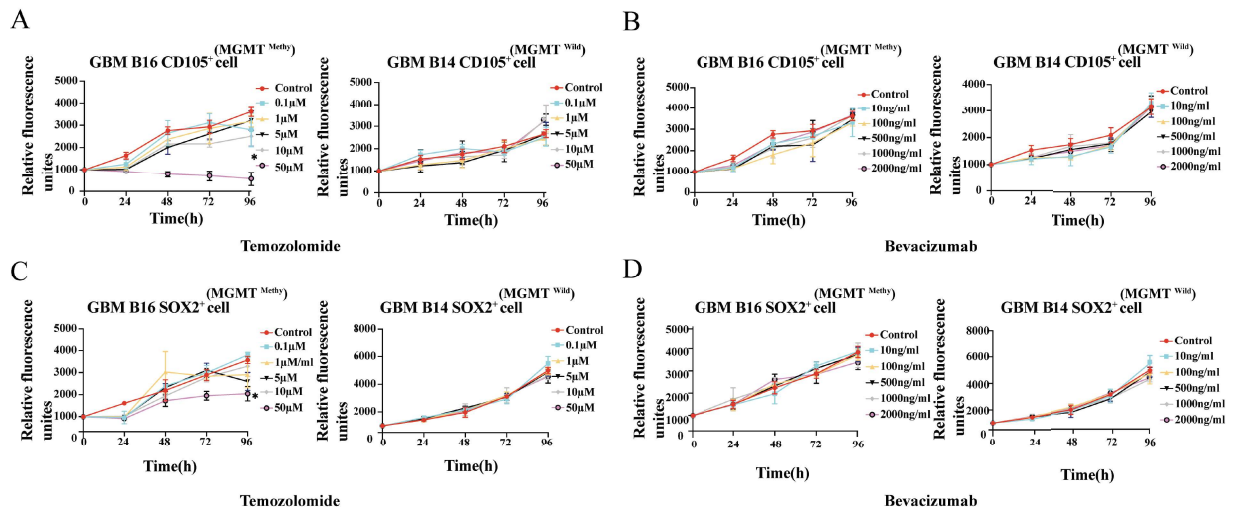

Supplement: 40478_2022_1422_MOESM3_ESM.pdf [file 40478_2022_1422_MOESM3_ESM.pdf]
