# Supplementary material for: Glioblastoma CD105+ cells define a SOX2− cancer stem cell-like subpopulation in the pre-invasive niche
Source: PubMed Central journal article supplement (PMC9426031; doi:10.1186/s40478-022-01422-8), 2022-08-29
Supplement: 40478_2022_1422_MOESM1_ESM.pdf [file 40478_2022_1422_MOESM1_ESM.pdf]

Table S1 The clinical relative information of the study.

| Patient's number | Gender | Age (years) | Pathology | IDH mutant | MGMT methylation | 1p19q codeletion | Other profiles                  | P or R |
|------------------|--------|-------------|-----------|------------|------------------|------------------|---------------------------------|--------|
| LU-GBM B1        | M      | 62          | GBM       | Wild type  | No               | No               | ATRX(+)<br>P53 w+               | P      |
| LU-GBM B2        | M      | 62          | GBM       | Wild type  | No               | No               | NA                              | P      |
| LU-GBM B3        | F      | 45          | GBM       | Wild type  | No               | No               | ATRX(+)<br>P53w+                | P      |
| LU-GBM B4        | M      | 59          | GBM       | Wild type  | No               | No               | ATRX(+)                         | P      |
| LU-GBM B5        | F      | 72          | GBM       | Wild type  | No               | No               | ATRX(+)                         | P      |
| LU-GBM B6        | M      | 55          | GBM       | Wild type  | Yes              | No               | NA                              | P      |
| LU-GBM B7        | F      | 61          | GBM       | Wild type  | Yes              | No               | CD34(+)<br>ATRX(+)<br>P53 w(+)  | P      |
| LU-GBM B8        | M      | 65          | GBM       | Wild type  | No               | No               | NA                              | R      |
| LU-GBM B9        | M      | 57          | GBM       | Wild type  | No               | No               | KRAS(-)<br>CTNNB1(-)<br>BRAF(-) | R      |
| LU-GBM B10       | M      | 75          | GBM       | Wild type  | Yes              | No               | ATRX(+)                         | P      |
| LU-GBM B11       | M      | 41          | GBM       | Wild type  | No               | No               | NA                              | P      |
| LU-GBM B12       | F      | 47          | GBM       | Wild type  | No               | No               | ATRX(+)                         | P      |
| LU-GBM B13       | M      | 63          | GBM       | Wild type  | No               | No               | ATRX(+)<br>P53 w+               | R      |
| LU-GBM B14       | M      | 55          | GBM       | Wild type  | No               | No               | NA                              | R      |
| LU-GBM B15       | M      | 59          | GBM       | Wild type  | Yes              | No               | NA                              | P      |
| LU-GBM B16       | M      | 60          | GBM       | Wild type  | Yes              | No               | NA                              | P      |
| LU-GBM B17       | M      | 60          | GBM       | Wild type  | No               | No               | NA                              | P      |

|            |   |    |     |           |    |    |         |   |
|------------|---|----|-----|-----------|----|----|---------|---|
| LU-GBM B18 | F | 63 | GBM | Wild type | No | No | ATRX(+) | P |
|------------|---|----|-----|-----------|----|----|---------|---|

M: male, F: female, GBM: glioblastoma, P: primary, R: recurrent.

Table S2 The cell markers using for GBM CD105<sup>+</sup> cell characterization.

| Antibody name | Supplier    | Catalog   | Application                | Detection methods | Results |
|---------------|-------------|-----------|----------------------------|-------------------|---------|
| CD105         | R&D         | AF1097    | 1:100                      | IF                | +       |
| CD105         | R&D         | AF1320    | 1:200                      | IF                | +       |
| CD105         | BD          | 560839    | 5ul/10 <sup>6</sup> cells  | Flow              | +       |
| CD105         | R&D         | FAB10971P | 5ul/10 <sup>6</sup> cells  | Flow              | +       |
| SOX2          | Merk        | AB5603    | 1:200                      | IF                | -       |
| CD133         | BD          | 566597    | 10ul/10 <sup>6</sup> cells | Flow              | -       |
| NESTIN        | Abcam       | MAB1259   | 1:200                      | IF                | +       |
| β III Tubulin | Abcam       | ab78078   | 1:500                      | IF                | +       |
| Vimentin      | Dako        | GA630     | 1:500                      | IF                | +       |
| CD31          | Dako        | M082329   | 1:100                      | IF                | +       |
| vWF           | Abcam       | ab9378    | 1:100                      | IF                | -       |
| CD34          | Abcam       | ab54208   | 1:200                      | IF                | +       |
| NG2           | R&D         | MAB2585   | 1:200                      | IF                | -       |
| α-SMA         | Merk        | A5228     | 1:250                      | IF                | +       |
| PDGF-β        | Santa Cruz  | SC16569   | 1:200                      | IF                | +       |
| CD90          | Santa Cruz  | SC 53116  | 1:100                      | IF                | -       |
| CD73          | Merk        | MABD122   | 1:100                      | IF                | -       |
| FAP           | eBioscience | BMS168    | 1:100                      | IF                | -       |
| Iba1          | Abcam       | ab5076    | 1:200                      | IF                | -       |
| TMEM119       | Abcam       | ab185333  | 1:100                      | IF                | -       |
| CD11b         | Abcam       | ab133357  | 1:200                      | IF                | -       |
| CD68          | Biorbyt     | Orb13303  | 1:100                      | IF                | -       |
| CD163         | Biorbyt     | Orb10343  | 1:100                      | IF                | -       |
| S100 β        | Abcam       | ab52642   | 1:200                      | IF                | -       |
| GFAP          | Abcam       | ab4674    | 1:500                      | IF                | -       |
| GFAP          | Abcam       | ab33922   | 1:1000                     | IF                | -       |
| NeuN          | Abcam       | ab104225  | 1:200                      | IF                | -       |
| PD-L1         | R&D         | MAB1561   | 1:100                      | IF                | -       |
| PD-L1         | BD          | 565188    | 5ul/10 <sup>6</sup> cells  | Flow              | +       |
| Ki67          | Abcam       | ab16667   | 1:200                      | IF                | +       |

IF: Immunofluorescence, Flow: Flow cytometry. “+”: antibody-stained positive cells. “-”: antibody-stained negative cells.

Table S3 The differentiation functional test for GBM CD105<sup>+</sup> cells.

| Cell line  | Passage of analysis | osteoblast | adipocyte | chondrocytes |
|------------|---------------------|------------|-----------|--------------|
| LU-GBM B4  | P3                  | +          | +         | -            |
| LU-GBM B7  | P4                  | +          | -         | -            |
| LU-GBM B12 | P3                  | +          | +         | -            |
| LU-GBM B14 | P3                  | +          | +         | -            |
| LU-GBM B15 | P2                  | +          | +         | -            |
| LU-GBM B16 | P4                  | +          | -         | -            |
| LU-GBM B17 | P3                  | +          | +         | -            |
| LU-GBM B18 | P4                  | +          | +         | -            |

“P”: Passage. “+” Positive cell staining for hOsteocalcin/ hFABP4/ hAggrecan. “-” Negative cell staining for hOsteocalcin/ hFABP4/ hAggrecan.

Table S4 Panel metrics summary of GBM CD105<sup>+</sup> cell exome sequencing.

| Sample ID  | Aligned Reads | Average Coverage | Percentage on target | Q30   | Uniformity |
|------------|---------------|------------------|----------------------|-------|------------|
| LU-GBM B14 | 366929130 M   | 485.8x           | 68.4%                | 93.9% | 95.10      |
| LU-GBM B15 | 365787418 M   | 471.4x           | 72.5%                | 94.4% | 95.11      |
| LU-GBM B16 | 290568937 M   | 378.7x           | 65.7%                | 93.7% | 95.28      |
| LU-GBM B17 | 234794987 M   | 305.9x           | 66.5%                | 93.8% | 95.39      |
| LU-GBM B18 | 197225790 M   | 254.7x           | 66.1%                | 94.1% | 95.33      |

Panel metrics based on DRAGEN alignm. Target Panel: TWIST-comprehensive. Padding: 20bp

Table S5 Variant calling metrics of GBM CD105<sup>+</sup> cell exome sequencing.

| Sample ID  | Variants | Multiallelic | SNP   | Ins  | Del  | Ti/Tv | Het/Hom | Filt SNP | M VC reads |
|------------|----------|--------------|-------|------|------|-------|---------|----------|------------|
| LU-GBM B14 | 30808    | 0.3%         | 92.3% | 3.7% | 4.0% | 2.7   | 0.6     | 3.1%     | 323.7      |
| LU-GBM B15 | 30106    | 0.3%         | 92.2% | 3.8% | 4.0% | 2.7   | 0.5     | 3.2%     | 318.1      |
| LU-GBM B16 | 35237    | 0.4%         | 92.7% | 3.5% | 3.6% | 2.6   | 1.0     | 2.4%     | 253.3      |
| LU-GBM B17 | 37779    | 0.4%         | 92.6% | 3.6% | 3.7% | 2.6   | 1.6     | 1.8%     | 203.3      |
| LU-GBM B18 | 37946    | 0.4%         | 92.7% | 3.6% | 3.7% | 2.6   | 1.7     | 1.9%     | 169.8      |

Variants: Total number of single-nucleotide polymorphisms (SNPs), Multiple Nucleotide Polymorphisms (MNPs) and structural variations caused by insertions or deletions (INDELs). Multiallelic: The percentage of sites that contains three or more observed alleles. SNP: single-nucleotide polymorphism. Ins: The percentage of insertion. Del: The percentage of deletion. Ti/Tv: The ratio of transition to transions. Het/Hom: The ratio of heterozygous variant calling or homozygous variant calling. Filt SNP: The percentage of raw SNPs minus the number of passed SNPs. M VC reads: The number of reads used for variant calling, excluding the duplicate reads and the reads outside of target region.
